# Supplementary material for: Enhanced resistance to decay of imprinted nanopatterns in thin films by bare nanoparticles compared to polymer-grafted nanoparticles
Source: Royal Society of Chemistry journal article supplement (doi:10.1039/d1na00206f), 2021-01-01
Supplement: d1na00206f1.pdf [file d1na00206f1.pdf]

**Supporting Information:**

**Enhanced Resilience to Thermal Decay of Imprinted Nanopatterns in Thin Films by  
Bare Nanoparticles Compared to Polymer-Grafted Nanoparticles**

*Sonal Bhadauriya<sup>1</sup>, Asritha Nallapaneni<sup>1</sup>, Xiaoteng Wang<sup>1</sup>, Jianan Zhang<sup>2</sup>, Ali  
Masud<sup>3</sup>, Michael R. Bockstaller<sup>2</sup>, Abdullah M. Al-Enizi<sup>4</sup>, Christopher M. Stafford<sup>5</sup>,  
Jack F. Douglas<sup>5\*</sup>, Alamgir Karim<sup>1,3\*</sup>*

<sup>1</sup>Department of Polymer Engineering, University of Akron, Akron, Ohio 44325, USA

<sup>2</sup>Department of Materials Science and Engineering, Carnegie Mellon University,  
Pittsburgh, Pennsylvania 15213, USA

<sup>3</sup>Department of Chemical and Biomolecular Engineering, University of Houston, Houston, Texas  
77204, USA

<sup>4</sup>Department of Chemistry, College of Science, King Saud University, Riyadh 11451, Saudi  
Arabia

<sup>5</sup>Materials Science and Engineering Division, National Institute of Standards and Technology,  
Gaithersburg, Maryland 20899, USA

### **Slumping Relaxation Dynamics for bare unmodified SiO<sub>2</sub> NP within PMMA Matrix**

Unmodified bare SiO<sub>2</sub> nanoparticle (b-SiO<sub>2</sub> NP) (4 nm to 5 nm nominal radius) were purchased from Nissan Chemicals and used as received. Figure S1a-e depicts the pattern height decay behavior at different slumping temperatures. Figure S1f shows the variation of the exponent  $\beta$  characterizing the degree of non-exponentiality of the relaxation process as a function with the of nanoparticle concentration and temperature. Figure S1g, h depicts the Arrhenius behavior of the relaxation time constant and the convergence of the extrapolated linear fits yielding a compensation. Figure S1i, j shows the concentration dependence of the activation parameters,  $E_a$  and  $-\ln \tau_0$  respectively. Figure S1k-n depicts the dispersion of a 5%, 10%, 20 % mass fraction (relative to the PMMA matrix) b-SiO<sub>2</sub> NP film captured by TEM.

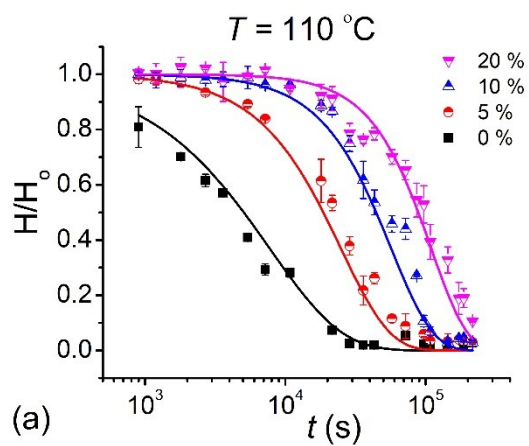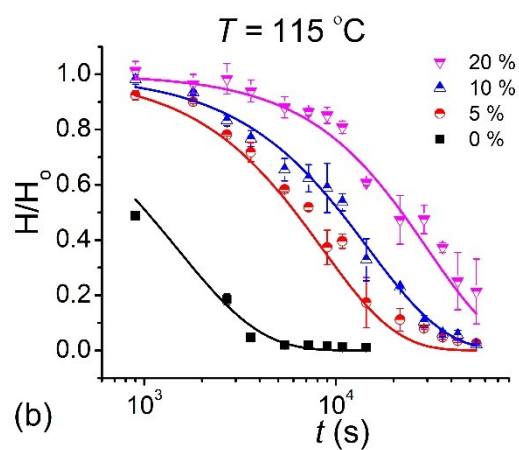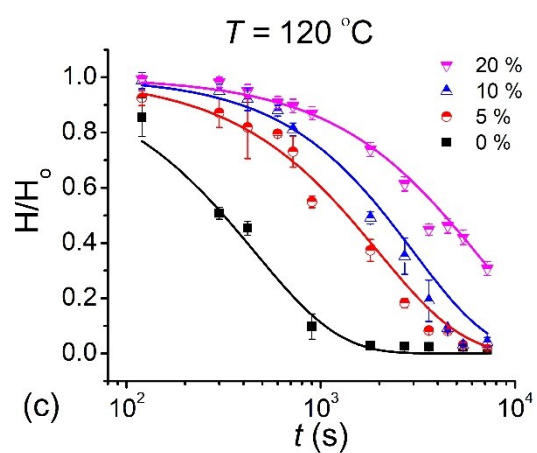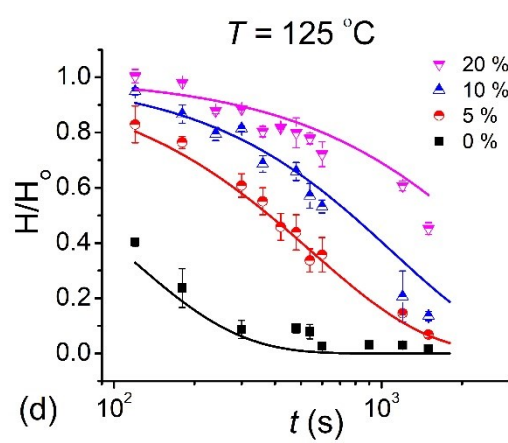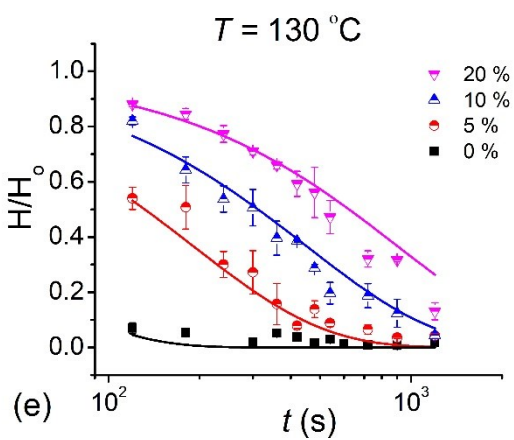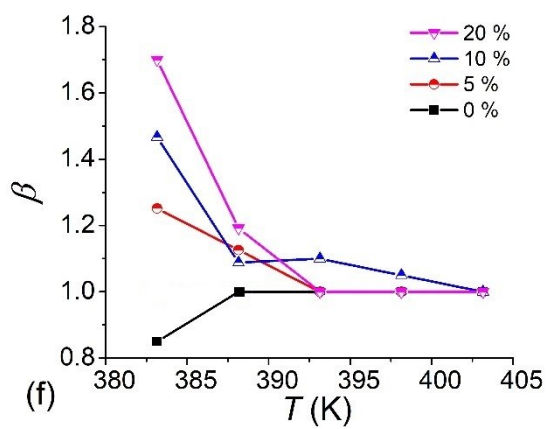

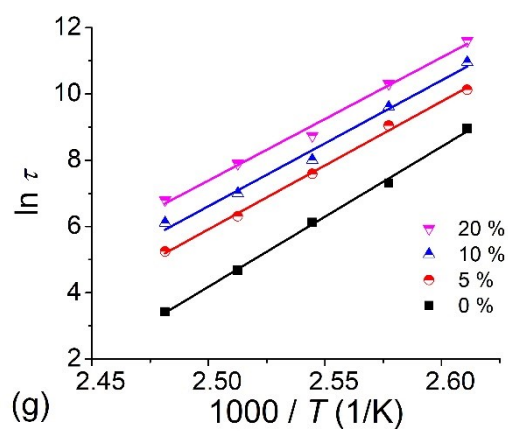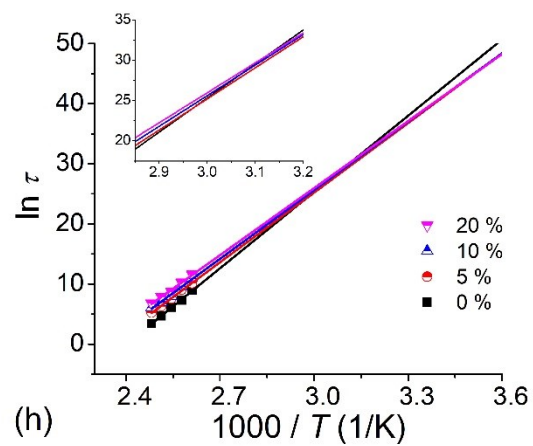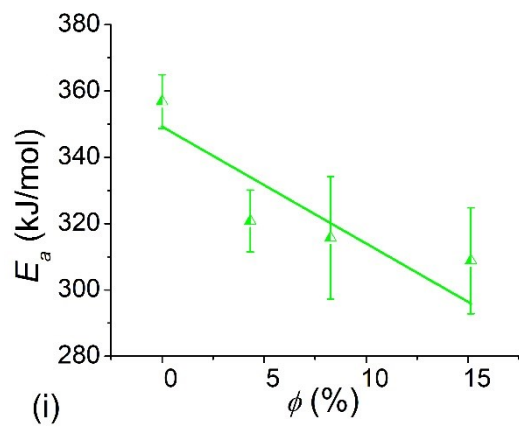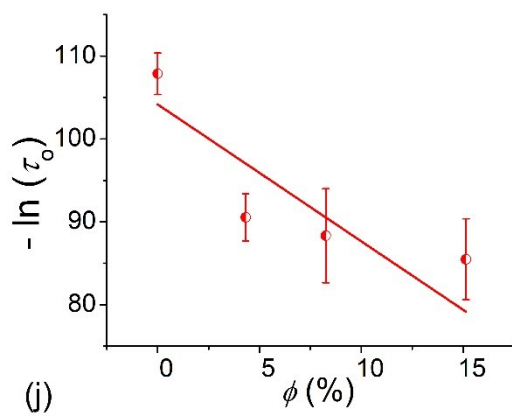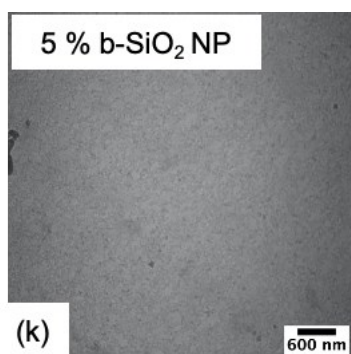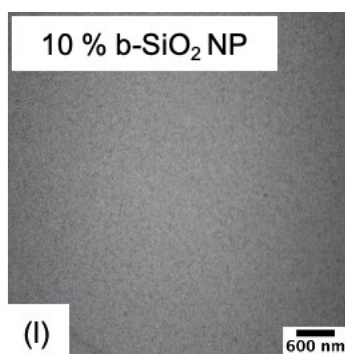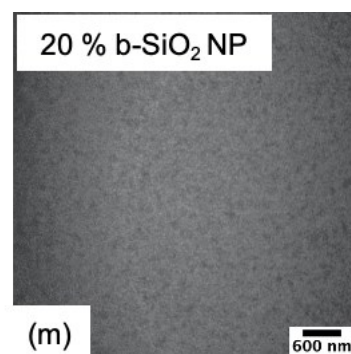

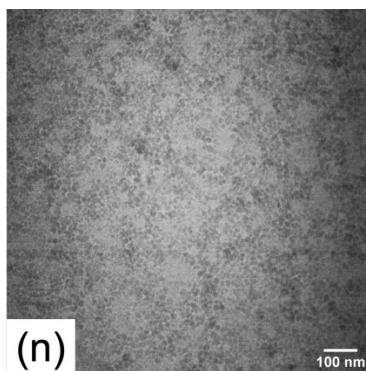

**Figure S1.** *Relaxation kinetics of bare unmodified SiO<sub>2</sub> NP system.* Normalized pattern height decays at (a) 110 °C, (b) 115 °C, (c) 120 °C, (d) 125 °C, and (e) 130 °C in patterned neat PMMA thin film (0 % - black filled squares) and PMMA thin films containing b-SiO<sub>2</sub> NP at mass fractions of 5 % (upper-filled red circles), 10% (upward upper-filled blue arrow) and 20 % (downward upper-filled purple arrow). Solid lines denote non-exponential fits to the data. The uncertainty intervals represent one standard deviation of the data, which is taken as the experimental uncertainty of the measurement. (f) Variation of the exponent  $\beta$  from the slumping relaxation curves as a function of  $T$  and different concentrations of b-SiO<sub>2</sub> NP within PMMA matrix. (g) Arrhenius plots for the temperature dependence of the relaxation time,  $\ln \tau$ . Solid lines show linear Arrhenius fits to the data. (h) Extrapolation of the linear fits leads to a point of convergence, near  $\approx 57.43$  °C to 64.69 °C, a temperature approximately 32.5 °C to 40 °C lower than the  $T_{g, bulk} \approx 97.24 (\pm 0.23)$  °C as computed from this plot. (i)  $E_a$  (kJ/mol) (light-green left-filled upward arrow,  $R^2 \approx 0.59$ ) as a function of volume fraction ( $\phi$ ) of the bare SiO<sub>2</sub> NP. (j)  $-\ln(\tau_0)$  (red left-filled circle,  $R^2 \approx 0.56$ ) as a function of volume fraction ( $\phi$ ) of the bare SiO<sub>2</sub> NP respectively. Error bars denotes the standard error of fitting. (k, l, m) TEM image for a 5%, 10% and 20 % mass fraction (relative to the PMMA matrix) b-SiO<sub>2</sub> NP filled film annealed at 180 °C for 1 h. Scale bar is 600 nm. (n) Zoomed-in TEM image for a 20 % mass fraction (relative to the PMMA matrix) b-SiO<sub>2</sub> NP filled film. Scale bar is 100 nm.

### Slumping Relaxation Dynamics for PMMA grafted SiO<sub>2</sub> NP within PMMA Matrix

The PMMA grafted Silica nanoparticles (g-SiO<sub>2</sub> NP) had an average radius of  $7.7 (\pm 2)$  nm after grafting as measured by transmission electron microscopy (TEM). The number average molecular mass ( $M_n$ ) of the grafted PMMA chains was measured to be 19.4 kg/mol using GPC with a polydispersity of 1.17. PMMA grafting density, was estimated to be  $\approx 0.65$  chains/nm<sup>2</sup> based on organic mass loss from TGA<sup>2</sup>. Figure S2a-e depicts the pattern height decay behavior at different

slumping temperatures. Figure S2f shows the variation of the exponent  $\beta$  characterizing the degree of non-exponential relaxation with the concentration of the NP and temperature. Figure S2g, h depicts the Arrhenius behavior of the relaxation time constant and the convergence of the extrapolated linear fits yielding a compensation. Figure S2i, j shows the volume fraction  $\phi$  dependence of the activation parameters,  $E_a$  and  $-\ln \tau_o$ , respectively. Figure S2k-n depicts the dispersion of a 5%, 10%, 20 % mass fraction (relative to the PMMA matrix) g-SiO<sub>2</sub> NP film captured by TEM.

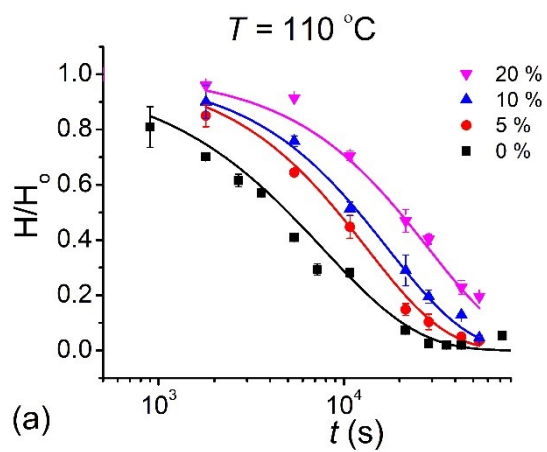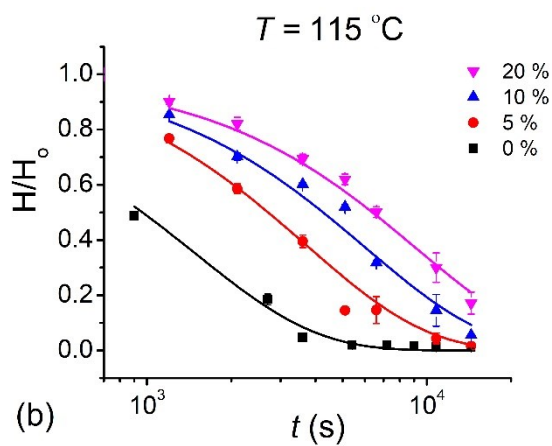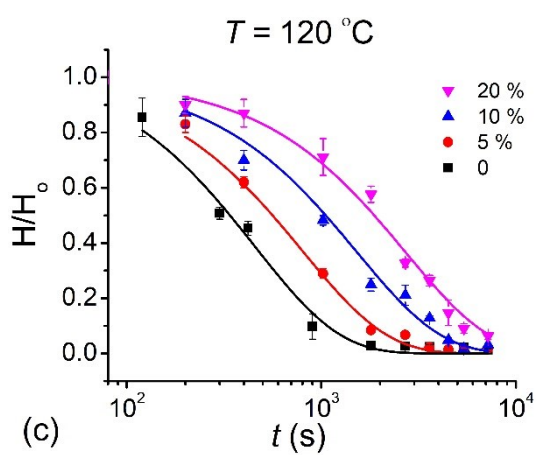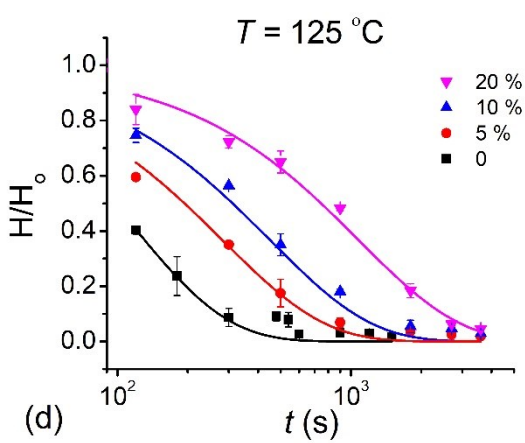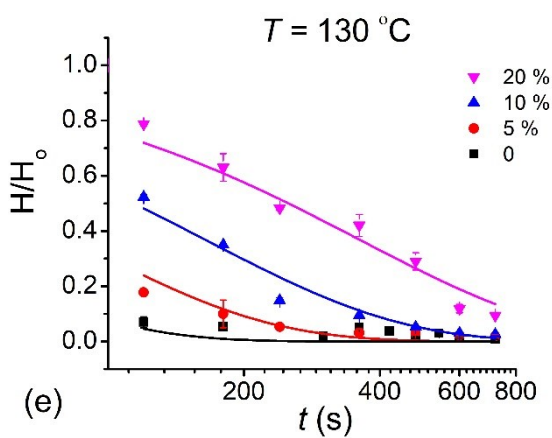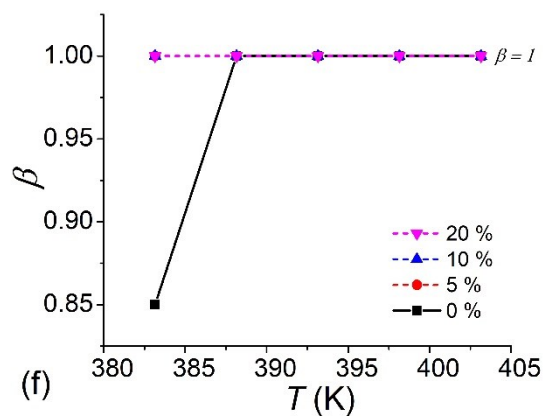

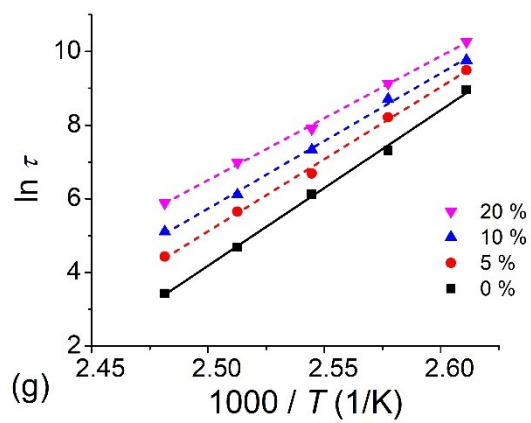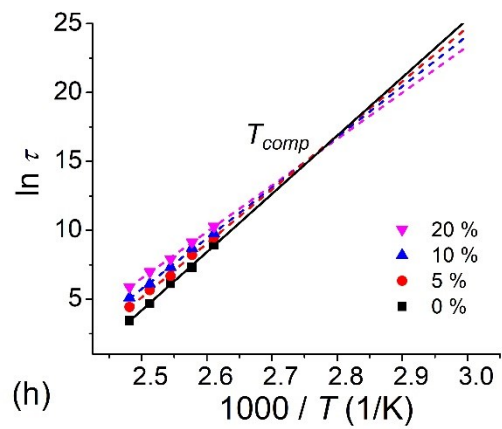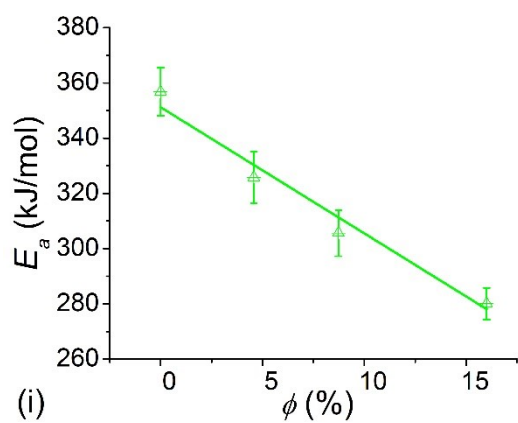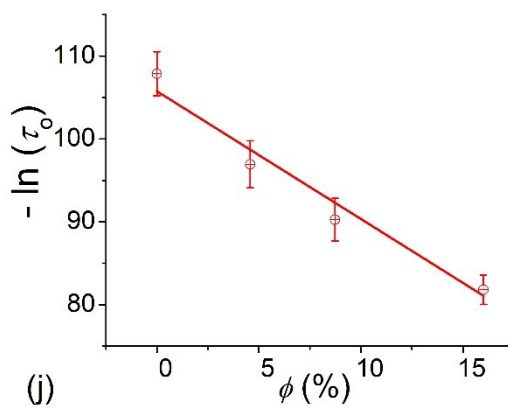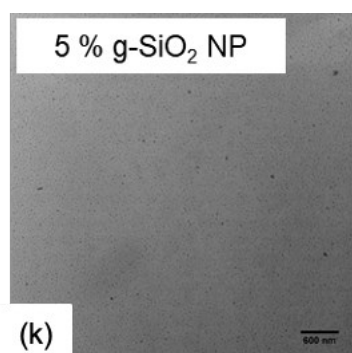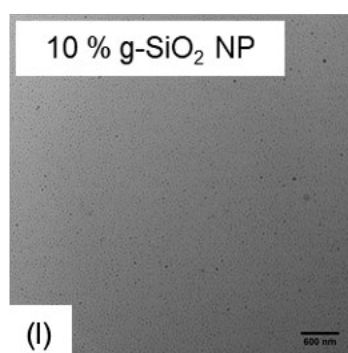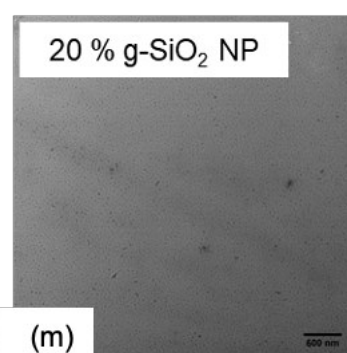



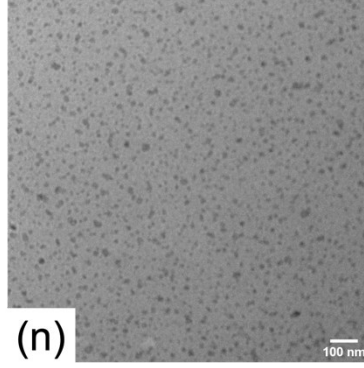

**Figure S2.** *Relaxation kinetics of grafted SiO<sub>2</sub> NP system.* Normalized pattern height  $H$  decays at (a) 110 °C, (b) 115 °C, (c) 120 °C, (d) 125 °C, and (e) 130 °C in patterned neat PMMA thin film (0 % - black filled squares) and PMMA thin films containing g-SiO<sub>2</sub> NP at mass fractions of 5 % (filled red circles), 10% (upward filled blue arrows) and 20 % (downward filled purple arrow). Solid lines denote non-exponential fits to the data. The error bars represent one standard deviation of the data, which is taken as the experimental uncertainty of the measurement. (f) Variation of the exponent  $\beta$  from the slumping relaxation curves as a function of  $T$  and different concentrations of g-SiO<sub>2</sub> NP within the PMMA matrix. (g) Arrhenius plots for the temperature dependence of the relaxation time,  $\ln \tau$ . Solid lines show linear Arrhenius fits. (h) Extrapolation of the linear fits leads to a point of convergence, near  $\approx 89.16$  °C to 94.49 °C, a temperature approximately 2 °C to 8 °C lower than the  $T_{g, bulk} \approx 97.24 (\pm 0.23)$  °C, as computed from this plot. (i)  $E_a$  (kJ/mol) (light-green cross-centered upward arrow,  $R^2 \approx 0.92$ ) as a function of volume fraction ( $\phi$ ) of the grafted SiO<sub>2</sub> NPs. (j)  $-\ln(\tau_0)$  (red cross-centered circle,  $R^2 \approx 0.92$ ) as a function of volume fraction ( $\phi$ ) of the grafted SiO<sub>2</sub> NP respectively. Uncertainty intervals denotes the standard error of fitting. (k, l, m) TEM image for a 5%, 10% and 20 % mass fraction (relative to the PMMA matrix) g-SiO<sub>2</sub> NP filled. (n) Zoomed-in TEM image for a 20 % mass fraction (relative to the PMMA matrix) g-SiO<sub>2</sub> NP filled film. Scale bar is 100 nm.

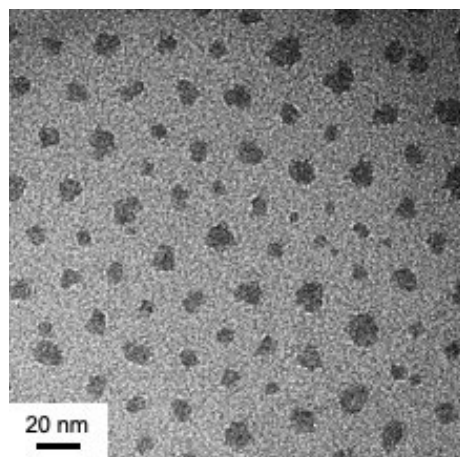

**Figure S3.** TEM micrograph of SiO<sub>2</sub> NP post grafting

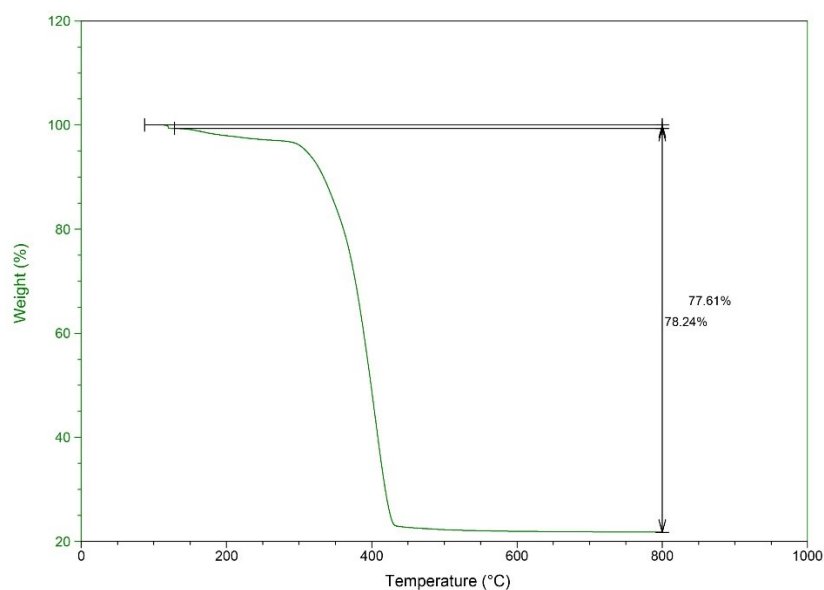

**Figure S4.** TGA curve showing the organic mass loss for the SiO<sub>2</sub> NP post grafting

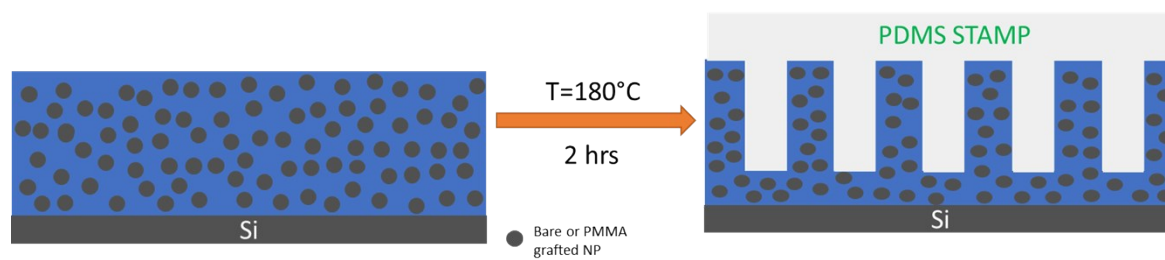

**Figure S5.** Schematic of imprinting nanocomposite films utilizing capillary force lithography

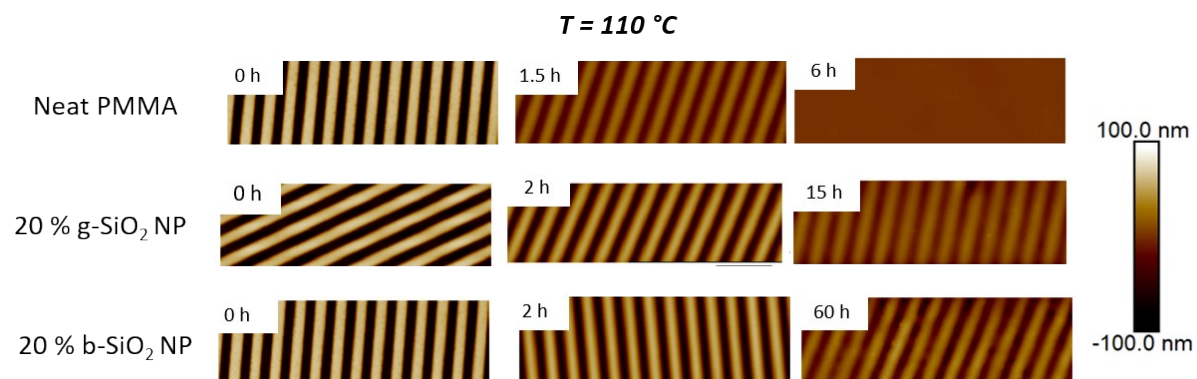

**Figure S6.** AFM micrographs for neat PMMA, 20% g-SiO<sub>2</sub> NP + PMMA and 20% b-SiO<sub>2</sub> NP + PMMA slumping at 110 °C
